# Supplementary material for: The Validity and Reliability of the PHQ-9 and PHQ-2 on Screening for Major Depression in Spanish Speaking Immigrants in Chile: A Cross-Sectional Study
Source: MDPI journal article supplement (doi:10.3390/ijerph192113975), 2022-10-27
Supplement: s1 [file s1]

## Supplementary Tables and Figure

**Figure S1.** Tested models of the Spanish version of PHQ-9

**Table S1.** Distribution of PHQ scores and 12 month-CIDI Major Depressive Disorder by immigrant group

**Table S2.** Internal consistency of the Chilean version of the PHQ-9 and PHQ-2 (n=897)

**Table S3.** Internal consistency of the Chilean version of the PHQ-9 by immigrant group

**Table S4.** Internal consistency of the Chilean version of the PHQ-2 by immigrant group

**Table S5.** Goodness of fit indices for PHQ-9 factor models by immigrant group

**Table S6.** Convergent validity coefficients of the PHQ-9 and PHQ-2 by immigrant group

**Figure S1.** Tested models of the Spanish version of PHQ-9

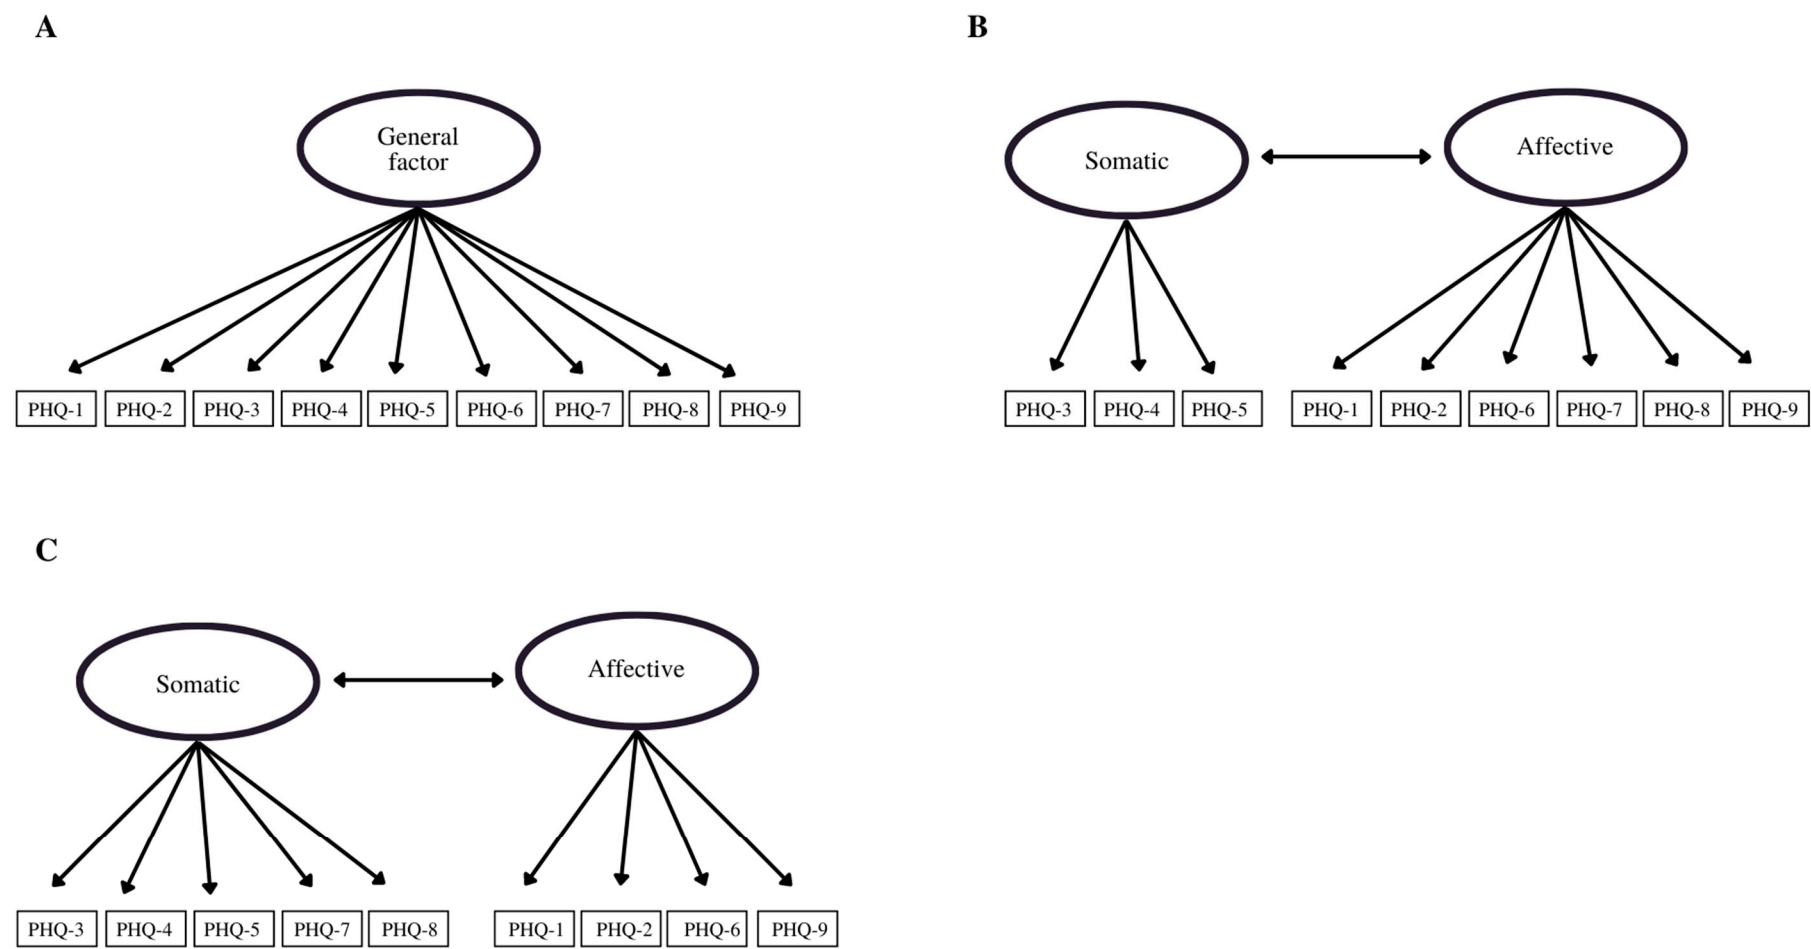

Note: A: Originally validated one-factor model of Kroenke [1] (Model 1); B: Two-factor model of Krause [2] (Model 2a); C: Two-factor model of Richardson and Richard [3] (Model 2b).

**Table S1.** Distribution of PHQ scores and 12 month-CIDI Major Depressive Disorder by immigrant group

| Questionnaire    | Colombia (n=94)  |    |         |                   | Peru (n=333) |         |                   |     | Venezuela (n=375) |                   |      |         | Other LA (n=95)   |   |      |                   |
|------------------|------------------|----|---------|-------------------|--------------|---------|-------------------|-----|-------------------|-------------------|------|---------|-------------------|---|------|-------------------|
|                  |                  |    | CIDI    |                   |              |         | CIDI              |     |                   |                   | CIDI |         |                   |   | CIDI |                   |
|                  | Symptom severity | n  | (%)     | negative positive | n            | (%)     | negative positive | n   | (%)               | negative positive | n    | (%)     | negative positive | n | (%)  | negative positive |
| PHQ-9            |                  |    |         |                   |              |         |                   |     |                   |                   |      |         |                   |   |      |                   |
| None (0-4)       |                  | 85 | (89.0)  | 85 0              | 286          | (83.0)  | 286 0             | 335 | (88.0)            | 334 1             | 84   | (87.9)  | 84 0              |   |      |                   |
| Mild (5-9)       |                  | 7  | (8.3)   | 6 1               | 27           | (9.8)   | 26 1              | 34  | (10.3)            | 32 2              | 5    | (5.6)   | 5 0               |   |      |                   |
| Moderate (10-14) |                  | 1  | (1.9)   | 1 0               | 11           | (4.2)   | 11 0              | 3   | (1.0)             | 3 0               | 4    | (2.3)   | 4 0               |   |      |                   |
| Severe (≥15)     |                  | 1  | (0.8)   | 1 0               | 9            | (2.9)   | 8 1               | 3   | (0.7)             | 3 0               | 2    | (4.2)   | 2 0               |   |      |                   |
| PHQ-2            |                  |    |         |                   |              |         |                   |     |                   |                   |      |         |                   |   |      |                   |
| Minimum (0-2)    |                  | 89 | (91.9)  | 88 1              | 312          | (92.8)  | 312 0             | 363 | (96.3)            | 360 3             | 91   | (98.6)  | 91 0              |   |      |                   |
| Mild (≥3)        |                  | 5  | (8.1)   | 5 0               | 21           | (7.2)   | 19 2              | 12  | (3.7)             | 12 0              | 4    | (1.4)   | 4 0               |   |      |                   |
| Total            |                  | 94 | (100.0) | 93 1              | 333          | (100.0) | 331 2             | 375 | (100.0)           | 372 3             | 95   | (100.0) | 95 0              |   |      |                   |

Note: Number of cases unweighted and % weighted.

Composite International Diagnostic Interview (CIDI); Latin America (LA); 9-item Patient Health Questionnaire (PHQ-9); 2-item Patient Health Questionnaire (PHQ-2).

**Table S2.** Internal consistency of the Chilean version of the PHQ-9 and PHQ-2 (n=897)

|                                         | all (n=897) |              |            |           |
|-----------------------------------------|-------------|--------------|------------|-----------|
| Version                                 | Corrected   |              | Overall    |           |
| Item                                    | item-total  | Alpha if     | Cronbach's | Spearman- |
|                                         | correlation | item deleted | alpha      | Brown     |
| PHQ-9                                   |             |              |            |           |
| 1. Anhedonia                            | 0.610       | 0.899        | 0.904      |           |
| 2. Depressed mood                       | 0.724       | 0.890        |            |           |
| 3. Sleep problems                       | 0.687       | 0.893        |            |           |
| 4. Low energy                           | 0.760       | 0.887        |            |           |
| 5. Appetite changes                     | 0.669       | 0.894        |            |           |
| 6. Low self-esteem                      | 0.706       | 0.891        |            |           |
| 7. Concentration difficulty             | 0.689       | 0.893        |            |           |
| 8. Psychomotor agitation or retardation | 0.655       | 0.895        |            |           |
| 9. Suicidal ideation                    | 0.682       | 0.897        |            |           |
| PHQ-2                                   |             |              |            |           |
| 1. Anhedonia                            | 0.604       |              | 0.746      | 0.620***  |
| 2. Depressed mood                       | 0.604       |              |            |           |

Note: 9-item Patient Health Questionnaire (PHQ-9); 2-item Patient Health Questionnaire (PHQ-2).

\*\*\*  $p \leq 0.001$

**Table S3.** Internal consistency of the Chilean version of the PHQ-9 by immigrant group

| Item                                       | Colombia (n=94)                        |                             |                                | Peru (n=333)                           |                             |                                | Venezuela (n=375)                      |                             |                                | Other LA (n=95)                        |                             |                                |
|--------------------------------------------|----------------------------------------|-----------------------------|--------------------------------|----------------------------------------|-----------------------------|--------------------------------|----------------------------------------|-----------------------------|--------------------------------|----------------------------------------|-----------------------------|--------------------------------|
|                                            | Corrected<br>item-total<br>correlation | Alpha if<br>item<br>deleted | Overall<br>Cronbach's<br>alpha |
| 1. Anhedonia                               | 0.451                                  | 0.900                       | 0.887                          | 0.795                                  | 0.939                       | 0.946                          | 0.524                                  | 0.838                       | 0.847                          | 0.578                                  | 0.881                       | 0.886                          |
| 2. Depressed mood                          | 0.540                                  | 0.887                       |                                | 0.845                                  | 0.936                       |                                | 0.634                                  | 0.827                       |                                | 0.747                                  | 0.870                       |                                |
| 3. Sleep problems                          | 0.845                                  | 0.859                       |                                | 0.783                                  | 0.940                       |                                | 0.630                                  | 0.826                       |                                | 0.609                                  | 0.877                       |                                |
| 4. Low energy                              | 0.735                                  | 0.866                       |                                | 0.810                                  | 0.939                       |                                | 0.653                                  | 0.823                       |                                | 0.829                                  | 0.856                       |                                |
| 5. Appetite changes                        | 0.782                                  | 0.861                       |                                | 0.741                                  | 0.943                       |                                | 0.566                                  | 0.832                       |                                | 0.599                                  | 0.877                       |                                |
| 6. Low self-esteem                         | 0.683                                  | 0.872                       |                                | 0.812                                  | 0.939                       |                                | 0.595                                  | 0.829                       |                                | 0.709                                  | 0.868                       |                                |
| 7. Concentration difficulty                | 0.622                                  | 0.876                       |                                | 0.812                                  | 0.939                       |                                | 0.550                                  | 0.834                       |                                | 0.672                                  | 0.871                       |                                |
| 8. Psychomotor agitation<br>or retardation | 0.712                                  | 0.875                       |                                | 0.842                                  | 0.937                       |                                | 0.575                                  | 0.832                       |                                | 0.631                                  | 0.881                       |                                |
| 9. Suicidal ideation                       | 0.738                                  | 0.873                       |                                | 0.723                                  | 0.943                       |                                | 0.555                                  | 0.841                       |                                | 0.700                                  | 0.880                       |                                |

Note: Latin America (LA).

\*  $p \leq 0.05$ ; \*\*  $p \leq 0.01$  \*\*\*  $p \leq 0.001$ **Table S4.** Internal consistency of the Chilean version of the PHQ-2 by immigrant group

| Item              | Colombia (n=94)                        |                                |                     | Peru (n=333)                           |                                |                    | Venezuela (n=375)                      |                                |                    | Other LA (n=95)                        |                                |                    |
|-------------------|----------------------------------------|--------------------------------|---------------------|----------------------------------------|--------------------------------|--------------------|----------------------------------------|--------------------------------|--------------------|----------------------------------------|--------------------------------|--------------------|
|                   | Corrected<br>item-total<br>correlation | Overall<br>Cronbach's<br>alpha | Spearman<br>- Brown | Corrected<br>item-total<br>correlation | Overall<br>Cronbach's<br>alpha | Spearman<br>-Brown | Corrected<br>item-total<br>correlation | Overall<br>Cronbach's<br>alpha | Spearman<br>-Brown | Corrected<br>item-total<br>correlation | Overall<br>Cronbach's<br>alpha | Spearman<br>-Brown |
| 1. Anhedonia      | 0.398                                  | 0.567                          | 0.503***            | 0.797                                  | 0.884                          | 0.725***           | 0.450                                  | 0.582                          | 0.465***           | 0.624                                  | 0.766                          | 0.731***           |
| 2. Depressed mood | 0.398                                  |                                |                     | 0.797                                  |                                |                    | 0.450                                  |                                |                    | 0.624                                  |                                |                    |

Note: Latin America (LA).

\*  $p \leq 0.05$ ; \*\*  $p \leq 0.01$  \*\*\*  $p \leq 0.001$

**Table S5.** Goodness of fit indices for PHQ-9 factor models by immigrant group

| Model         | Fit values      |                             |       |                        | Factor correlation |
|---------------|-----------------|-----------------------------|-------|------------------------|--------------------|
|               | Immigrant group | $\chi^2$ (df)               | CFI   | RMSEA (90% CI)         | SRMR               |
| One factor 1  |                 |                             |       |                        |                    |
|               | Colombia        | 188.508 <sub>(27)</sub> *** | 0.764 | 0.144*** (0.040-0.247) | 0.078              |
|               | Peru            | 299.707 <sub>(27)</sub> *** | 0.931 | 0.135*** (0.089-0.182) | 0.047              |
|               | Venezuela       | 309.755 <sub>(27)</sub> *** | 0.884 | 0.107*** (0.039-0.164) | 0.074              |
|               | Other LA        | 184.314 <sub>(27)</sub> *** | 0.599 | 0.175*** (0.086-0.257) | 0.095              |
|               | All (n=897)     | 515.414 <sub>(27)</sub> *** | 0.915 | 0.117*** (0.087-0.149) | 0.052              |
| Two factor 2a |                 |                             |       |                        |                    |
|               | Colombia        | 135.412 <sub>(26)</sub> *** | 0.881 | 0.104*** (0.010-0.207) | 0.077              |
|               | Peru            | 249.898 <sub>(26)</sub> *** | 0.950 | 0.117*** (0.066-0.166) | 0.043              |
|               | Venezuela       | 240.663 <sub>(26)</sub> *** | 0.946 | 0.073*** (0.015-0.139) | 0.069              |
|               | Other LA        | 178.692 <sub>(26)</sub> *** | 0.596 | 0.179*** (0.092-0.261) | 0.102              |
|               | All (n=897)     | 405.081 <sub>(26)</sub> *** | 0.942 | 0.099*** (0.066-0.132) | 0.050              |
| Two factor 2b |                 |                             |       |                        |                    |
|               | Colombia        | 188.237 <sub>(26)</sub> *** | 0.748 | 0.152*** (0.044-0.255) | 0.078              |
|               | Peru            | 285.922 <sub>(26)</sub> *** | 0.935 | 0.133*** (0.085-0.181) | 0.046              |
|               | Venezuela       | 303.827 <sub>(26)</sub> *** | 0.886 | 0.109*** (0.038-0.167) | 0.075              |
|               | Other LA        | 181.352 <sub>(26)</sub> *** | 0.597 | 0.179*** (0.089-0.262) | 0.113              |
|               | All (n=897)     | 508.634 <sub>(26)</sub> *** | 0.917 | 0.119*** (0.087-0.151) | 0.052              |

Note: Robust Comparative Fit Index (CFI); confidence interval (CI); degrees of freedom (df); Latin American (LA); Robust Root Mean Square Error of Approximation (RMSEA); Standardized Root Mean Square Residual (SRMR); Chi-square ( $\chi^2$ ).

\*\*\* p < 0.001

Model 1: Originally validated one-factor model of Kroenke [1].

Model 2a: Two-factor model of Krause [2] with item 3, 4 and 5 loaded on one somatic factor and the six remaining items loaded on an affective factor .

Model 2b: Two-factor model of Richardson and Richard [3] with item 3,4,5,7,8 loaded on the somatic factor and four remaining items loaded on an affective factor.

**Table S6.** Convergent validity coefficients of the PHQ-9 and PHQ-2 by immigrant group

|       | Colombia (n=94) |          | Peru (n=333) |          | Venezuela (n=375) |          | Other LA (n=95) |          | all (n=897) |          |
|-------|-----------------|----------|--------------|----------|-------------------|----------|-----------------|----------|-------------|----------|
|       | PHQ-9           | PHQ-2    | PHQ-9        | PHQ-2    | PHQ-9             | PHQ-2    | PHQ-9           | PHQ-2    | PHQ-9       | PHQ-2    |
| PHQ-9 | -               | 0.689*** | -            | 0.828*** | -                 | 0.729*** | -               | 0.566*** | -           | 0.714*** |
| PHQ-2 | 0.689***        | -        | 0.828***     | -        | 0.729***          | -        | 0.566***        | -        | 0.714***    | -        |
| GAD-7 | 0.607***        | 0.442*** | 0.643***     | 0.581*** | 0.617***          | 0.459*** | 0.595***        | 0.532*** | 0.625***    | 0.520*** |

Note: General Anxiety Disorder 7 items (GAD-7); Latin American (LA); 9-item Patient Health Questionnaire (PHQ-9); 2-item Patient Health Questionnaire (PHQ-2).

\*\*\*  $p \leq 0.001$

## References

1. Kroenke K, Spitzer RL, Williams JB: The PHQ-9: validity of a brief depression severity measure. *J Gen Intern Med* 2001, 16(9):606-613.
2. Krause JS, Bombardier C, Carter RE: Assessment of depressive symptoms during inpatient rehabilitation for spinal cord injury: is there an underlying somatic factor when using the PHQ? *Rehabilitation Psychology* 2008, 53(4):513.
3. Richardson EJ, Richards JS: Factor structure of the PHQ-9 screen for depression across time since injury among persons with spinal cord injury. *Rehabilitation Psychology* 2008, 53(2):243-249.
